# Supplementary material
Source: JCI journal article supplement (doi:10.1172/jci177743)
Supplement: sd1 [file 1]

# Supplemental Figure 1

**A**

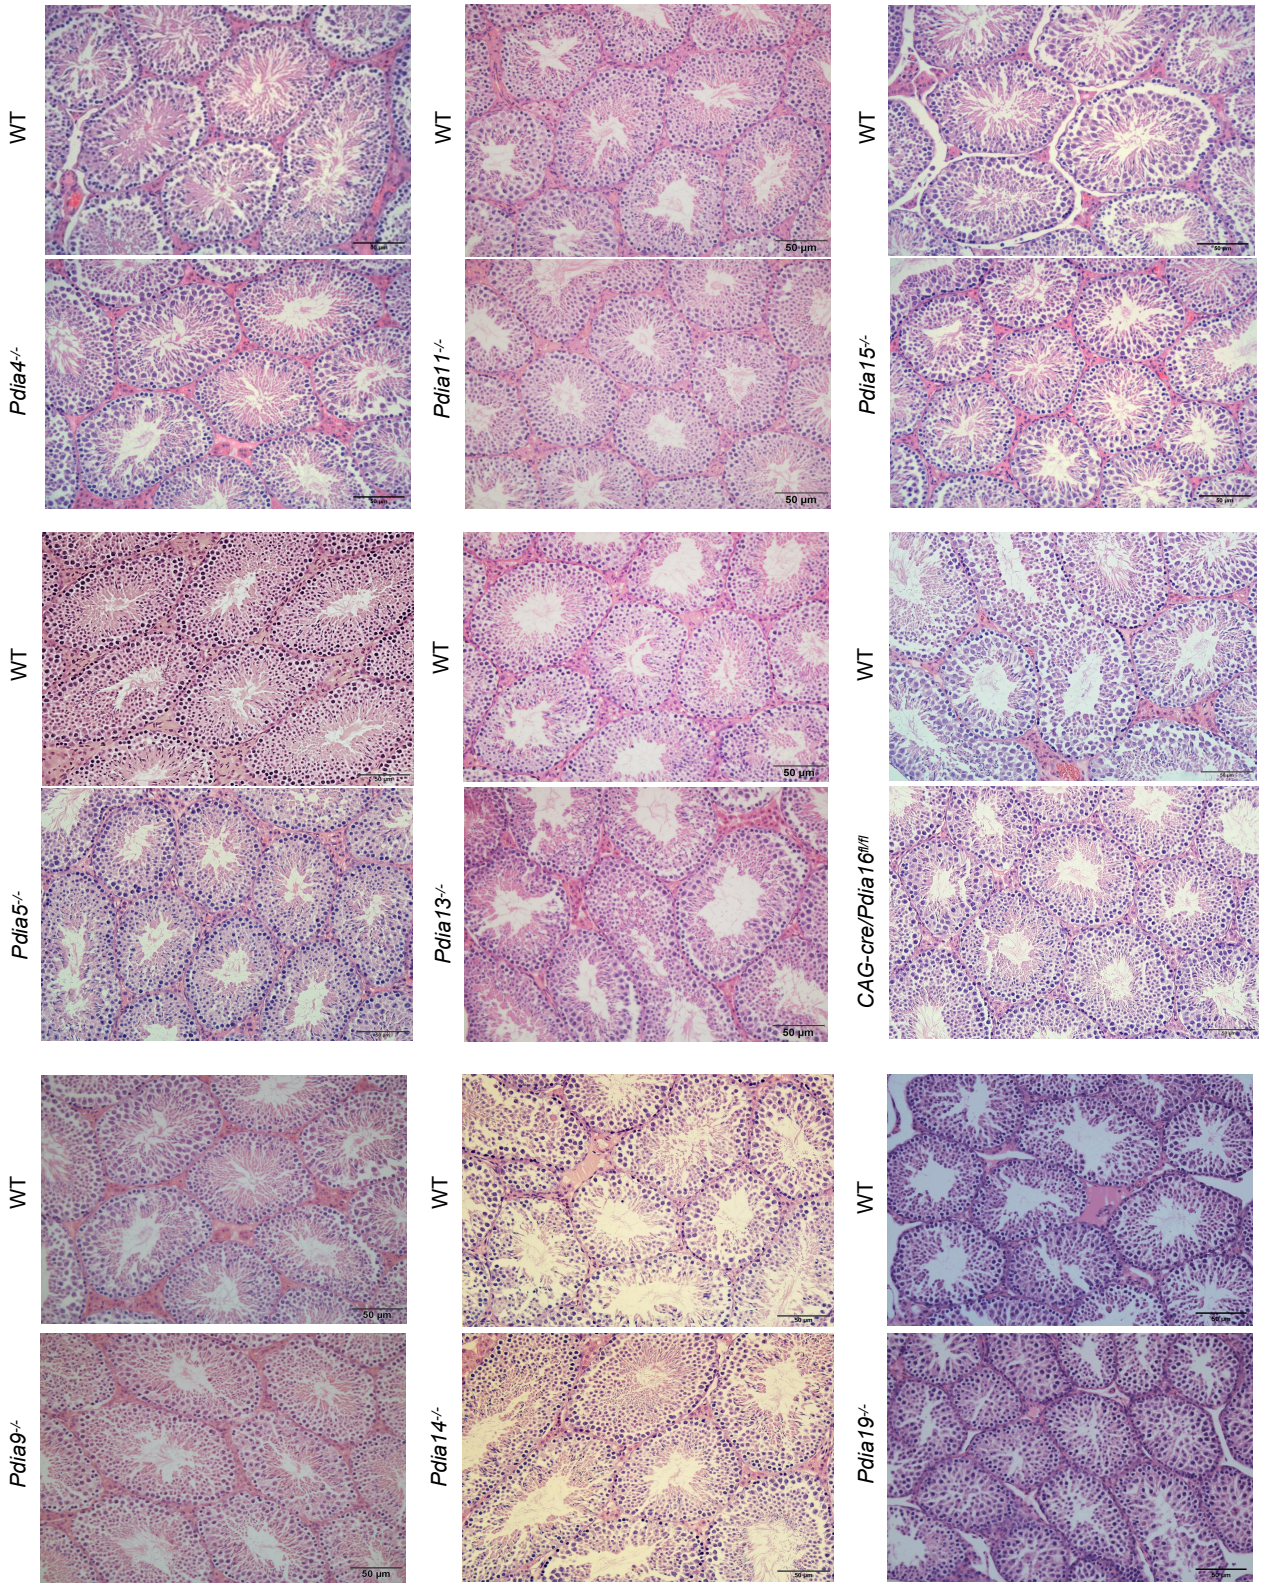

**B**

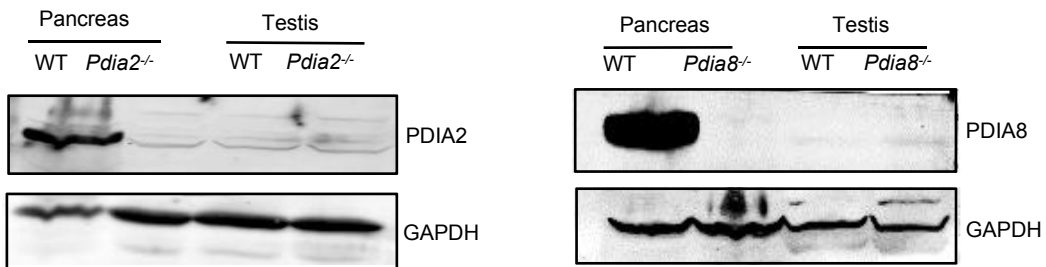

# Supplemental Figure 2

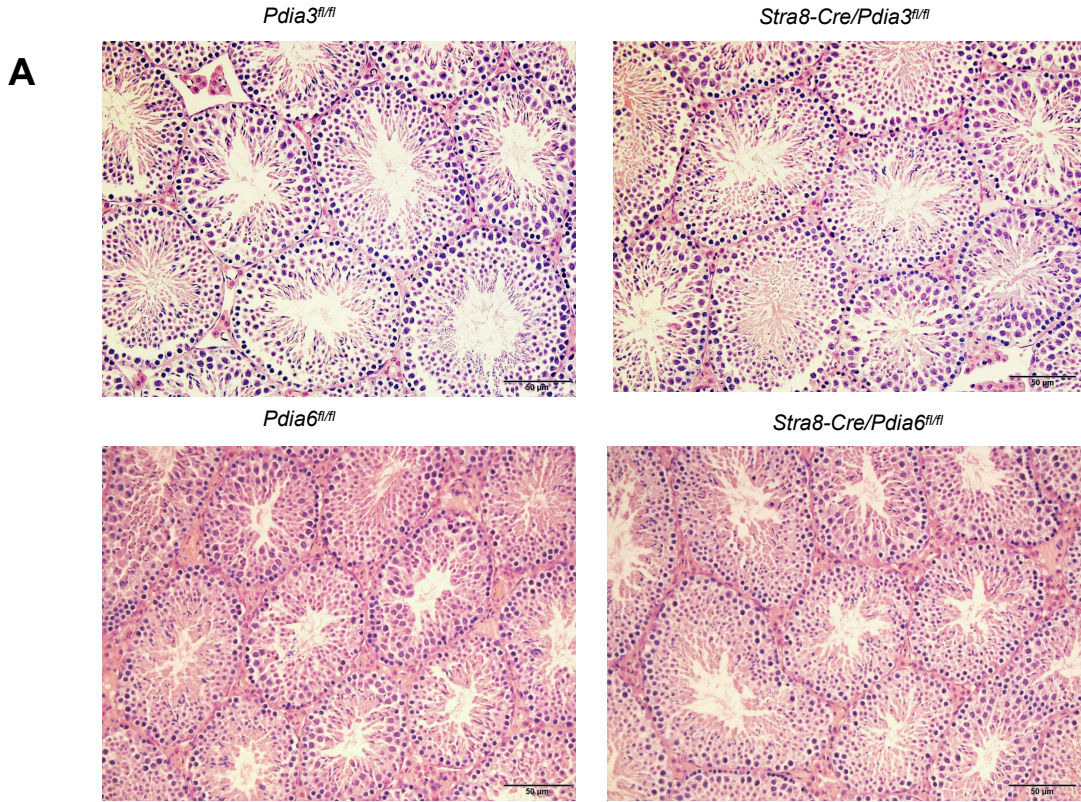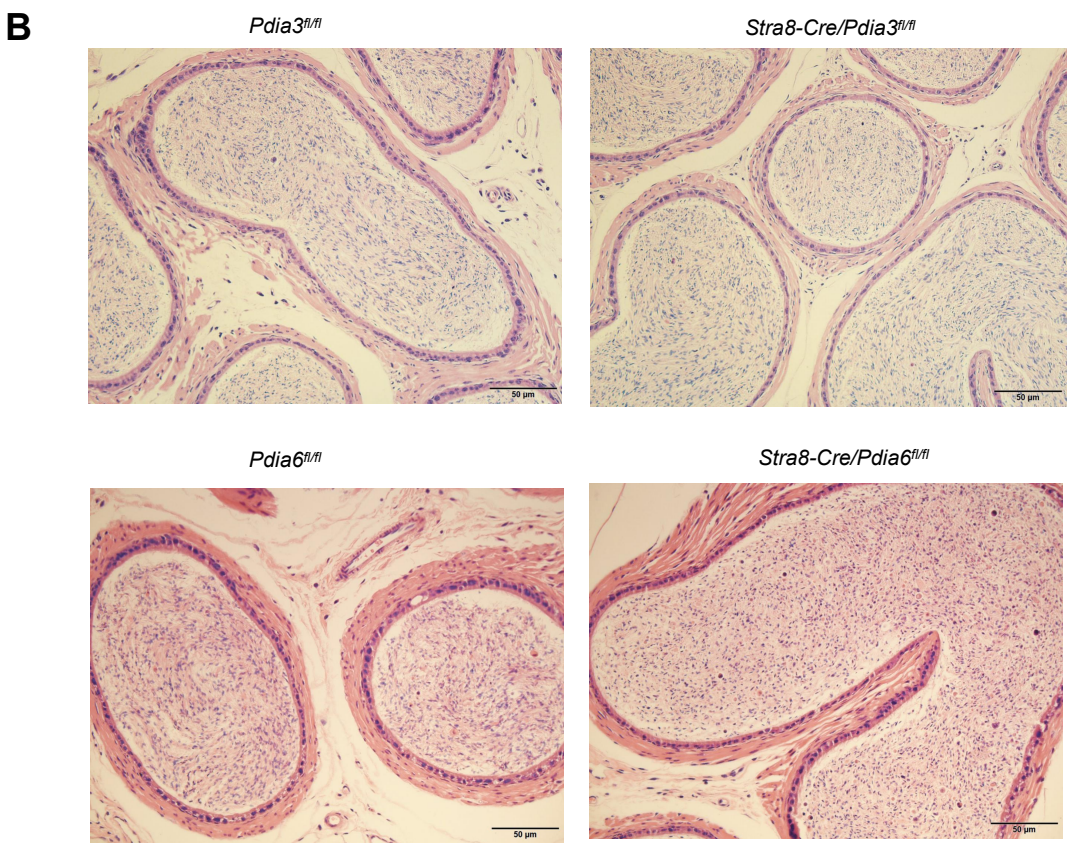

# Supplemental Figure 3

**A**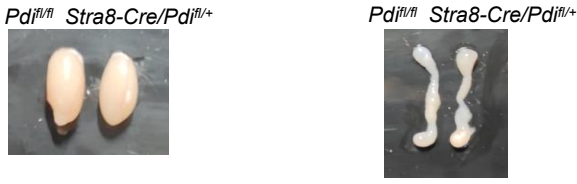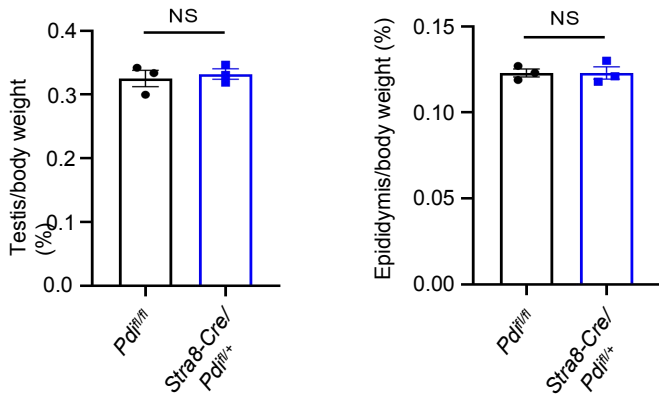**B**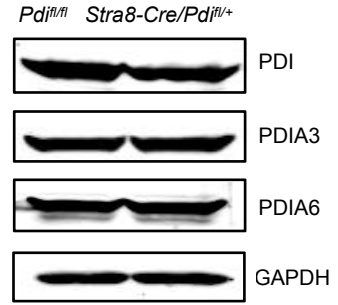**C**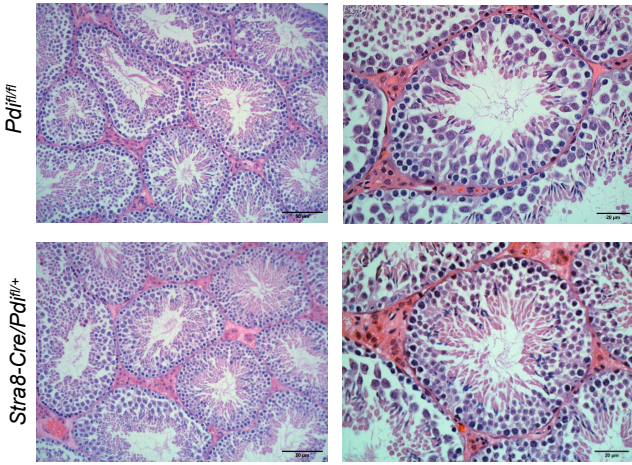**D**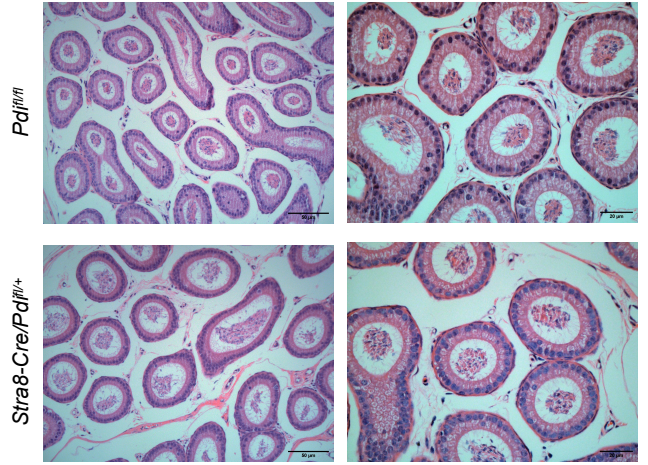**E**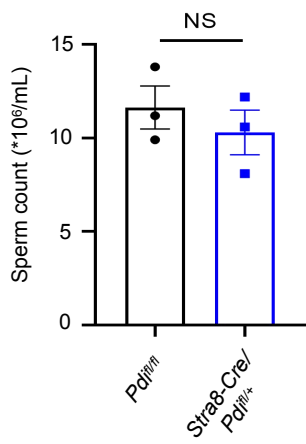**F**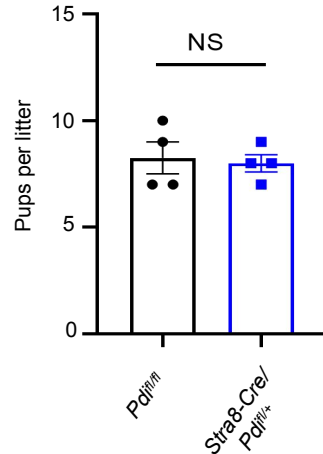

# Supplemental Figure 4

**A**

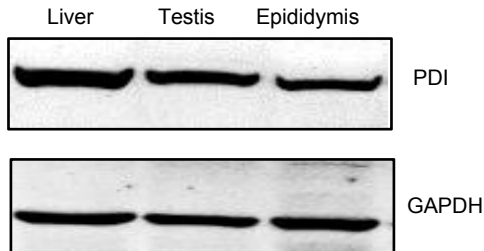

**B**

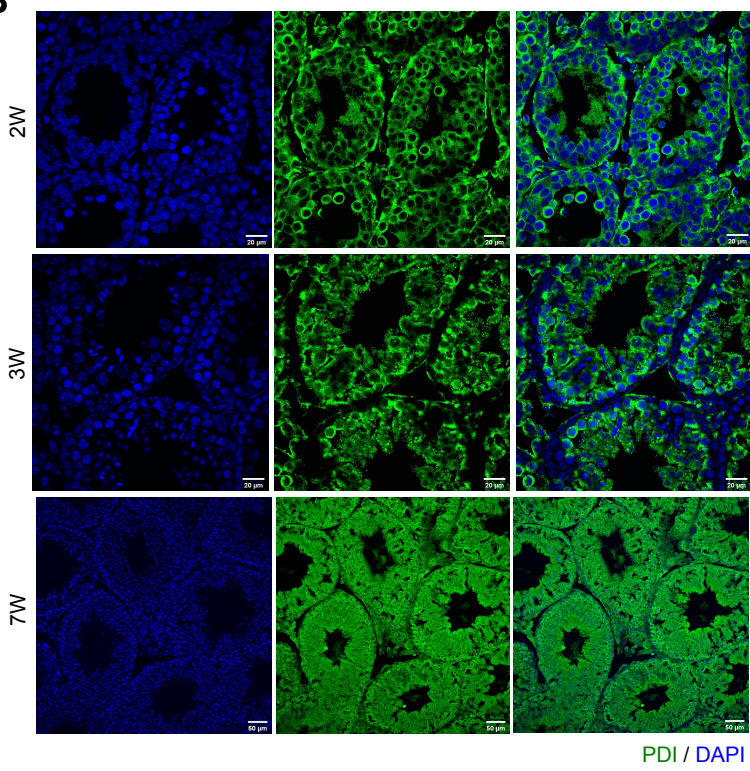

**C**

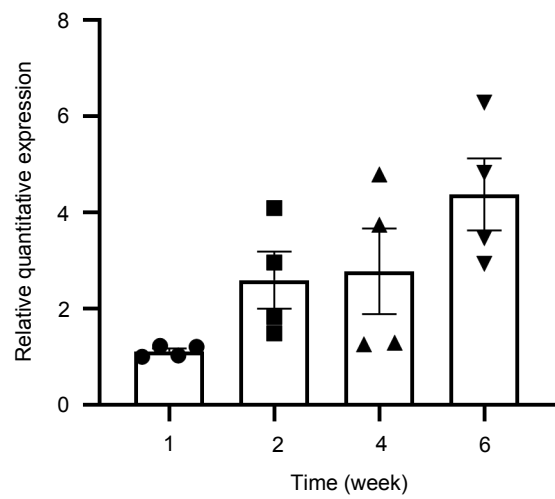

# Supplemental Figure 5

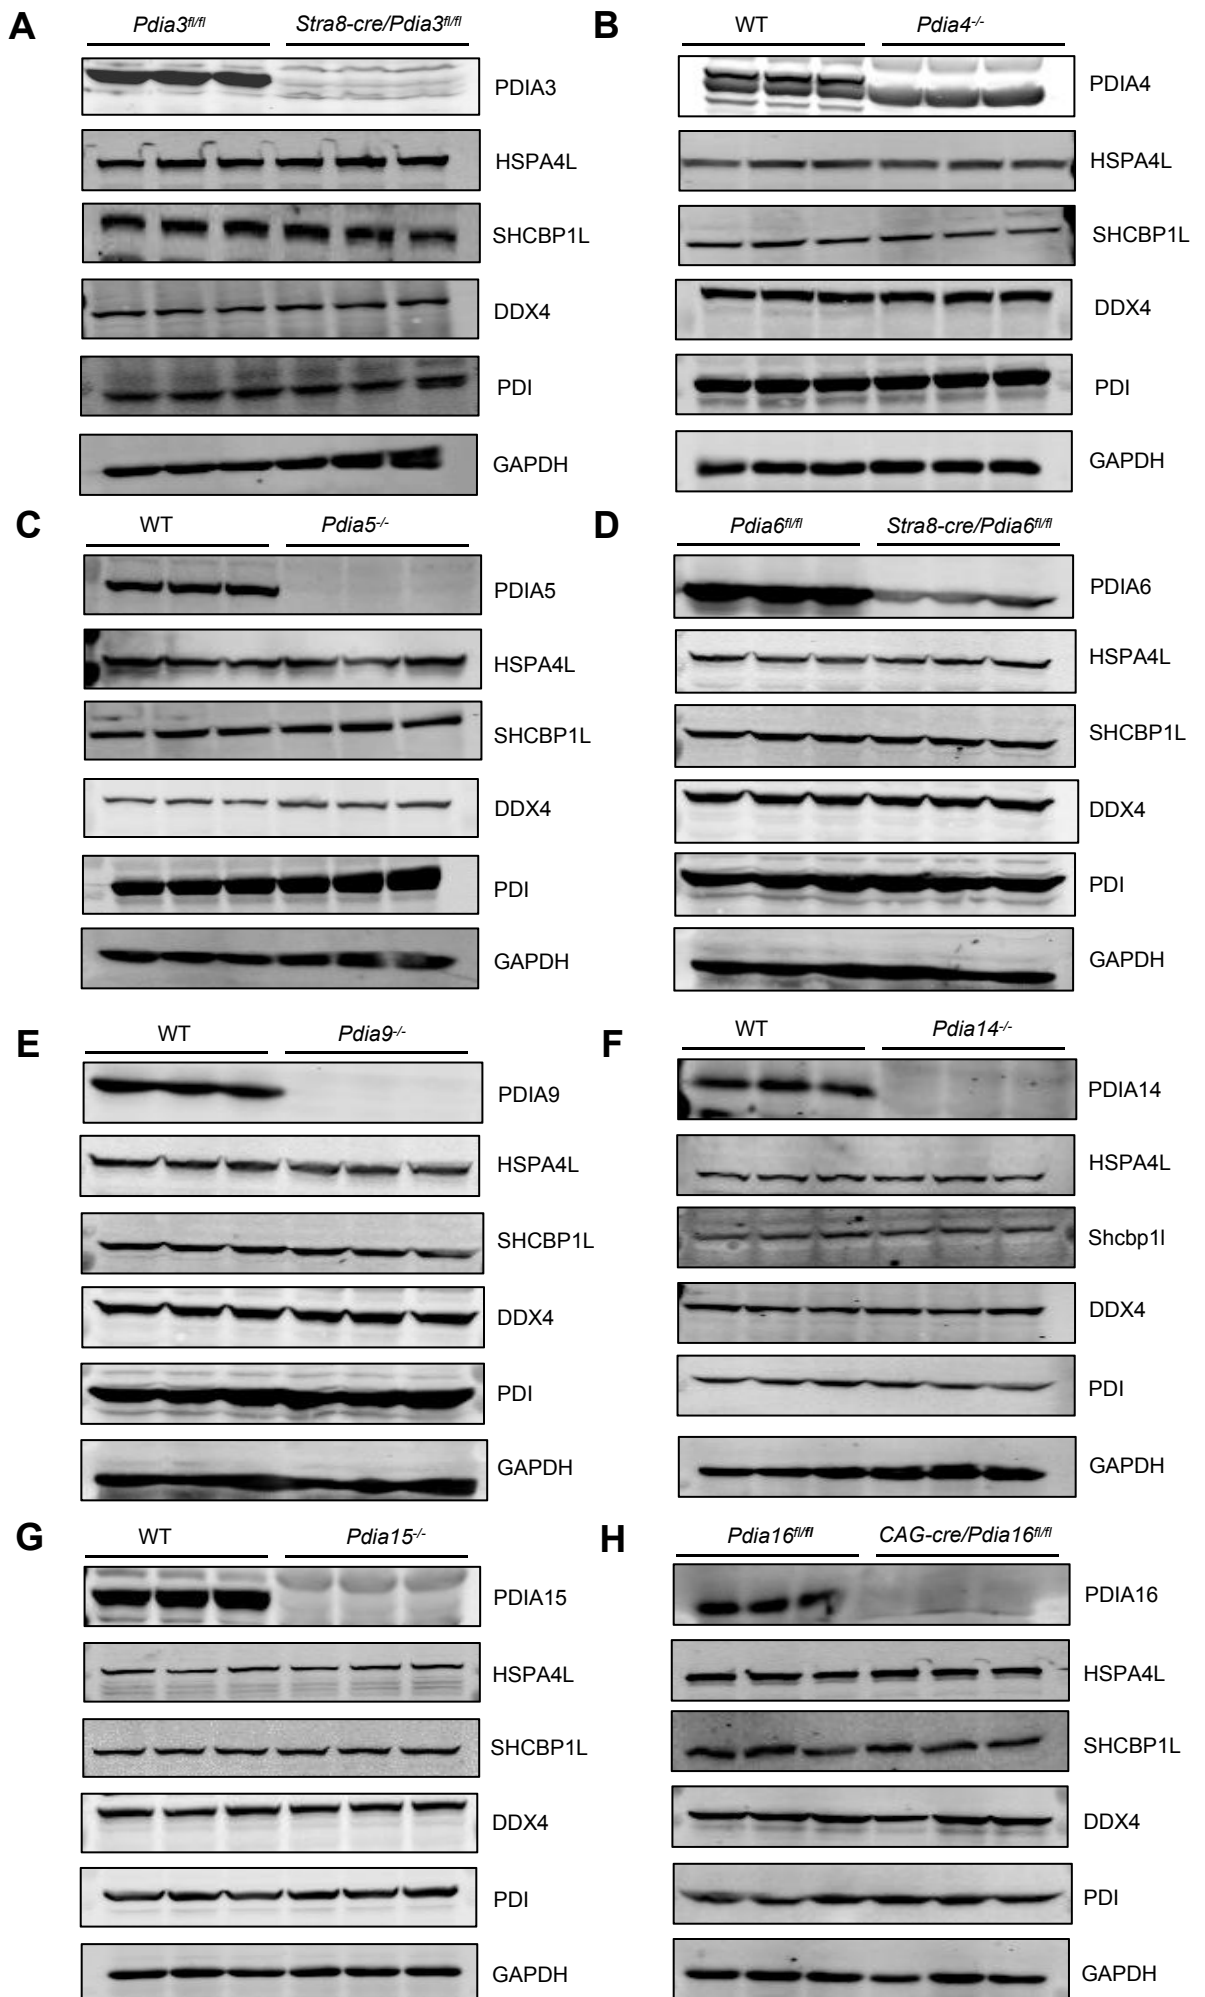

## Supplemental figure legend and tables

**Supplemental Figure 1. The absence of other PDI family members does not affect spermatogenesis. (A)** H&E-stained testicular and epididymal sections of control, and *Pdia4*<sup>-/-</sup>, *Pdia5*<sup>-/-</sup>, *Pdia9*<sup>-/-</sup>, *Pdia11*<sup>-/-</sup>, *Pdia13*<sup>-/-</sup>, *Pdia14*<sup>-/-</sup>, *Pdia15*<sup>-/-</sup>, *CAG-Cre/Pdia16*<sup>fl/fl</sup>, and *Pdia19*<sup>-/-</sup> adult mice testes. Scale bars, 50 μm. **(B)** Western blotting analysis of PDIA2 and PDIA8 in testes and pancreas from adult mice. GAPDH as an internal loading control.

**Supplemental Figure 2. Generation of *Stra8-Cre/Pdia3*<sup>fl/fl</sup> and *Stra8-Cre/Pdia6*<sup>fl/fl</sup> mice. (A)** H&E-stained testes of control, *Stra8-Cre/Pdia3*<sup>fl/fl</sup>, and *Stra8-Cre/Pdia6*<sup>fl/fl</sup> adult mice. *Stra8-Cre* mice were generated as previously described (Cell Research, 2017;27(10):1216-1230). Scale bars, 50 μm. **(B)** H&E-stained epididymis of control, *Stra8-Cre/Pdia3*<sup>fl/fl</sup>, and *Stra8-Cre/Pdia6*<sup>fl/fl</sup> adult mice. Scale bars, 50 μm.

**Supplemental Figure 3. *Stra8-Cre/Pdi*<sup>fl/+</sup> mice has normal fertility. (A)** Images of testes and epididymis from control and *Stra8-Cre/Pdi*<sup>fl/+</sup> adult mice. Quantification of testis and epididymis weight to body-weight ratios (mean ± SEM, n=3, NS, not significant, Student's t test). **(B)** Western blotting analysis of PDIs protein in testes from control and *Stra8-Cre/Pdi*<sup>fl/+</sup> adult mice. GAPDH as an internal loading control. **(C)** H&E-stained testicular sections of control and *Stra8-Cre/Pdi*<sup>fl/+</sup> adult mice. Scale bars, 50 μm. **(D)** H&E-stained epididymal sections of control and *Stra8-Cre/Pdi*<sup>fl/+</sup> adult mice. Scale bars, 50 μm. **(E)** Sperm counts from control and *Stra8-Cre/Pdi*<sup>fl/+</sup> adult mice (mean ± SEM, n=3, NS, not significant, Student's t test). **(F)** Fertility test of control and *Stra8-Cre/Pdi*<sup>fl/+</sup> adult male mice (mean ± SEM, n=4, NS, not significant, Student's t test).

**Supplemental Figure 4. PDI protein is widely expressed in testes. (A)**

Western blotting analysis of PDI protein levels in adult mouse tissues, normalized to GAPDH. **(B)** Immunostaining of PDI in testes of mice at 2, 3, and 7 weeks. Scale bar, 20  $\mu$ m. **(C)** qPCR analysis of *Pdi* mRNA levels at the indicated time points after birth in testes, normalized to GAPDH (mean  $\pm$  SEM, n=4, Student's t test).

**Supplemental Figure 5. The deletion of other PDI family members does not affect the expression of HSPA4L, SHCBP1L, and DDX4. (A-H)** Western blotting analysis of the expression of HSPA4L, SHCBP1L, and DDX4 in testes of mice lacking *Pdia3*, *Pdia4*, *Pdia5*, *Pdia6*, *Pdia9*, *Pdia14*, *Pdia15* and *Pdia16*. **A.** *Pdia3<sup>fl/fl</sup>* and *Stra8-Cre/Pdia3<sup>fl/fl</sup>*. **B.** control and *Pdia4<sup>-/-</sup>*. **C.** control and *Pdia5<sup>-/-</sup>*. **D.** *Pdia6<sup>fl/fl</sup>* and *Stra8-Cre/Pdia6<sup>fl/fl</sup>*. **E.** control and *Pdia9<sup>-/-</sup>*. **F.** control and *Pdia14<sup>-/-</sup>*. **G.** control and *Pdia15<sup>-/-</sup>*. **H.** *Pdia16<sup>fl/fl</sup>* and *CAG-Cre/Pdia16<sup>fl/fl</sup>*. GAPDH as an internal loading control.

#### Supplemental Table 1. Primer sequences used for genotyping

| Genes         | Forward                  | Reverse                  |
|---------------|--------------------------|--------------------------|
| PDI flox 1/2  | TCAGCTTCTTGTGGCACTAAGCTG | CTCCTCAATCTGTTTCGCATTCCC |
| Stra8-cre 1/2 | ACTCCAAGCACTGGGCAGAA     | GCCACCATAGCAGCATCAAA     |
| Stra8-cre 1/3 | ACTCCAAGCACTGGGCAGAA     | CGTTTACGTGCGCCGTCCAG     |
| UBC-cre 1/2   | GCGGTCTGGCAGTAAAACTATC   | ACCATTGCCCTGTTTCACT      |

#### Supplemental Table 2. Primer sequences used for quantitative PCR

| Genes | Forward              | Reverse              |
|-------|----------------------|----------------------|
| PDI   | CTCGACAAAGATGGGGTTGT | GCAAGAACAGCAGGATGTGA |
| PDIA2 | AGAATGGAAACCGCACAAAC | GACACCTTCCTCATCCTCCA |
| PDIA3 | TGGTGTGGCCACTGTAAGAA | TTTAATTCACGGCCACCTTC |
| PDIA4 | ATCGCCAAGATGGATGCTAC | CTTGGTCCTGCTCCTCTTTG |
| PDIA5 | GGGAAGAACAGCAGACAAGC | TCTTACAGTGTGGGCACCAA |

---

|        |                      |                      |
|--------|----------------------|----------------------|
| PDIA6  | GGTGAGCTGCACCTTCTTTC | GCTGCTTTCTTCCATTCTGG |
| PDIA7  | AAATGCAGGGTGCTGTTACC | AAGCCCTTCATGGTGTGTTT |
| PDIA8  | TCTGCCTCTTTGACTGGTT  | TGCGCATGCTCTCTTCATAC |
| PDIA9  | CCTGAAGATCATGGGAAGA  | TGGTCACAGCTCCTCCTTCT |
| PDIA10 | TGTGCCTTCCTTTCTGCTTT | CGGACAAGAGGGACACATTT |
| PDIA11 | CTGGTGTCTGCTTGTGAGA  | TAGTCCTTGGGCCACATAG  |
| PDIA12 | TGTGCCTGCTTCTGATTTTG | CACTCCCTTCGAGAAACAGC |
| PDIA13 | GGAATGAAGTTGGGCTTGAA | CCCAGACACTCTGTGAGCAA |
| PDIA14 | GTGACAGCAAACCAGAGCA  | CCCGGTCTCCACAATTTCTA |
| PDIA15 | AAAGGAATTCCCAGGCTTGT | CCGTTGTGTTCTCCCACTTT |
| PDIA16 | GGAGAGGCCACTGACAGAAG | GTTAATCCCCAAGTGGCTCA |
| PDIA17 | ACCGGCTCTACGCTTATGAA | CTGCCTTCTGGTCTCCTGAC |
| PDIA18 | TTGTCACCTGATGGGCAGTA | TACTGCCCATCAGGTGACAA |
| PDIA19 | GCTGGGGTCTTGGATTTTT  | CGGCTCTCACTTTTCCTTTG |

---
